# Supplementary material
Source: MDPI journal article supplement (https://www.mdpi.com/2071-1050/14/17/10877)
Supplement: s1 [file s1]

Supplementary Materials

# Adsorptive Removal of Lead and Chromate Ions from Water by Using Iron-Doped Granular Activated Carbon Obtained from Coconut Shells

Lubna Jaber <sup>1,2</sup>, Ihsanullah Ihsanullah <sup>3</sup>, Ismail W. Almanassra <sup>1,\*</sup>, Sumina Namboorimadathil Backer <sup>1</sup>, Alaa Abushawish <sup>1,4</sup>, Abdelrahman K. A. Khalil <sup>1,5</sup>, Hussain Alawadhi <sup>1,6</sup>, Abdallah Shanableh <sup>1,4</sup> and Muataz Ali Atieh <sup>1,7,\*</sup>

- <sup>1</sup> Research Institute of Sciences & Engineering (RISE), University of Sharjah, Sharjah P.O. Box 27272, United Arab Emirates; ljaber@sharjah.ac.ae (L.J.); sbacker@sharjah.ac.ae (S.N.B.); ayabushawish@sharjah.ac.ae (A.A.); abdelrahman.khalil@sharjah.ac.ae (A.K.A.K.); halawadhi@sharjah.ac.ae (H.A.); shanableh@sharjah.ac.ae (A.S.)
  - <sup>2</sup> Department of Chemistry, College of Sciences, University of Sharjah, Sharjah P.O. Box 27272, United Arab Emirates
  - <sup>3</sup> Center for Environment and Water, Research Institute, King Fahd University of Petroleum and Minerals, Dhahran 31261, Saudi Arabia; ihsankhan@kfupm.edu.sa
  - <sup>4</sup> Department of Civil and Environmental Engineering, University of Sharjah, Sharjah P.O. Box 27272, United Arab Emirates
  - <sup>5</sup> Department of Industrial Engineering and Engineering Management, University of Sharjah, Sharjah P.O. Box 27272, United Arab Emirates
  - <sup>6</sup> Department of Applied Physics and Astronomy, University of Sharjah, Sharjah P.O. Box 27272, United Arab Emirates
  - <sup>7</sup> Chemical and Water Desalination Engineering Program (CWDE), College of Engineering, University of Sharjah, Sharjah P.O. Box 27272, United Arab Emirates
- \* Correspondence: ialmanassra@sharjah.ac.ae (I.W.A.); mhussien@sharjah.ac.ae (M.A.A.)

## Tables

**Table S1.** List of the isotherm models used for surfactants equilibrium data interpretation.

| Isotherm Model        | Mathematical Equation                               | Related Parameters                                                                                                                          |
|-----------------------|-----------------------------------------------------|---------------------------------------------------------------------------------------------------------------------------------------------|
| Langmuir [52]         | $q_e = \frac{X_m h C_e}{(1 + h C_e)}$               | $X_m$ , Langmuir maximum adsorption capacity ( $\text{mg g}^{-1}$ ), $h$ Langmuir constant ( $\text{L mg}^{-1}$ )                           |
| Freundlich [53]       | $q_e = K_F C_e^{\frac{1}{n_F}}$                     | $K_F$ Freundlich adsorption capacity coefficient ( $\text{mg/g}/(\text{mg L}^{-1})^{1/n}$ ), $n_F$ coefficient of adsorption intensity      |
| Sips [54]             | $q_e = \frac{Q_S K_S C_e^{n_S}}{1 + K_S C_e^{n_S}}$ | $Q_S$ and $K_S$ Sips model constants ( $\text{L g}^{-1}$ and $\text{L mg}^{-1}$ , respectively), $n_S$ Sips model exponent                  |
| Redlich-Peterson [55] | $q_e = \frac{K_R C_e}{1 + b_R C_e^{n_R}}$           | $K_R$ and $b_R$ Redlich-Peterson model constants ( $\text{L g}^{-1}$ and $\text{mg}^{-1}$ , respectively), $n_R$ Redlich-Peterson exponent. |

Where,  $q_e$  is the adsorption capacity ( $\text{mg g}^{-1}$ ) and  $C_e$  is the equilibrium concentration ( $\text{mg L}^{-1}$ ).

**Table S2.** Kinetic models used for experimental data interpretation.

| Kinetic Model                 | Non linearized Mathematical Equation        | XY Scheme                |
|-------------------------------|---------------------------------------------|--------------------------|
| Intra-particle diffusion [56] | $q_t = k_{ip} \sqrt{t} + c$                 | $q_t$ vs $t^{1/2}$       |
| Pseudo-1st order [57]         | $\frac{dq_t}{dt} = k_1 (q_e - q_t)$         | $\log(q_e - q_t)$ vs $t$ |
| Pseudo-2nd-order [58]         | $\frac{dq_t}{dt} = k_2 (q_e - q_t)^2$       | $\frac{t}{q_t}$ vs $t$   |
| Elovich model [59]            | $\frac{dq_t}{dt} = \alpha \exp(-\beta q_t)$ | $q_t$ vs $\ln(t)$        |

Where,  $q_t$  ( $\text{mg g}^{-1}$ ) is the amount of surfactant removed at time  $t$  (min).  $k_{ip}$  ( $\text{mg (g min}^{1/2})^{-1}$ ) and  $c$  ( $\text{mg g}^{-1}$ ) are the intra-particle diffusion model constant and intra-particle diffusion model intercept, respectively.  $k_1$  ( $\text{min}^{-1}$ ) is the rate constant of the pseudo-first order whereas  $k_2$  ( $\text{min.mg/g}$ ) is the rate constant of the pseudo-second order. Lastly,  $q_e$  ( $\text{mg g}^{-1}$ ) is the amount of Pb(II) and Cr(T) removed at equilibrium.

### Figures

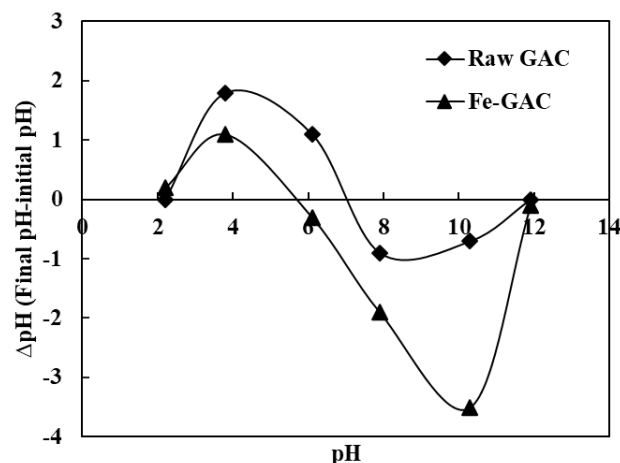

Figure S1. Determination of  $\text{pH}_{\text{pzc}}$  of raw GAC and Fe-GAC 5.

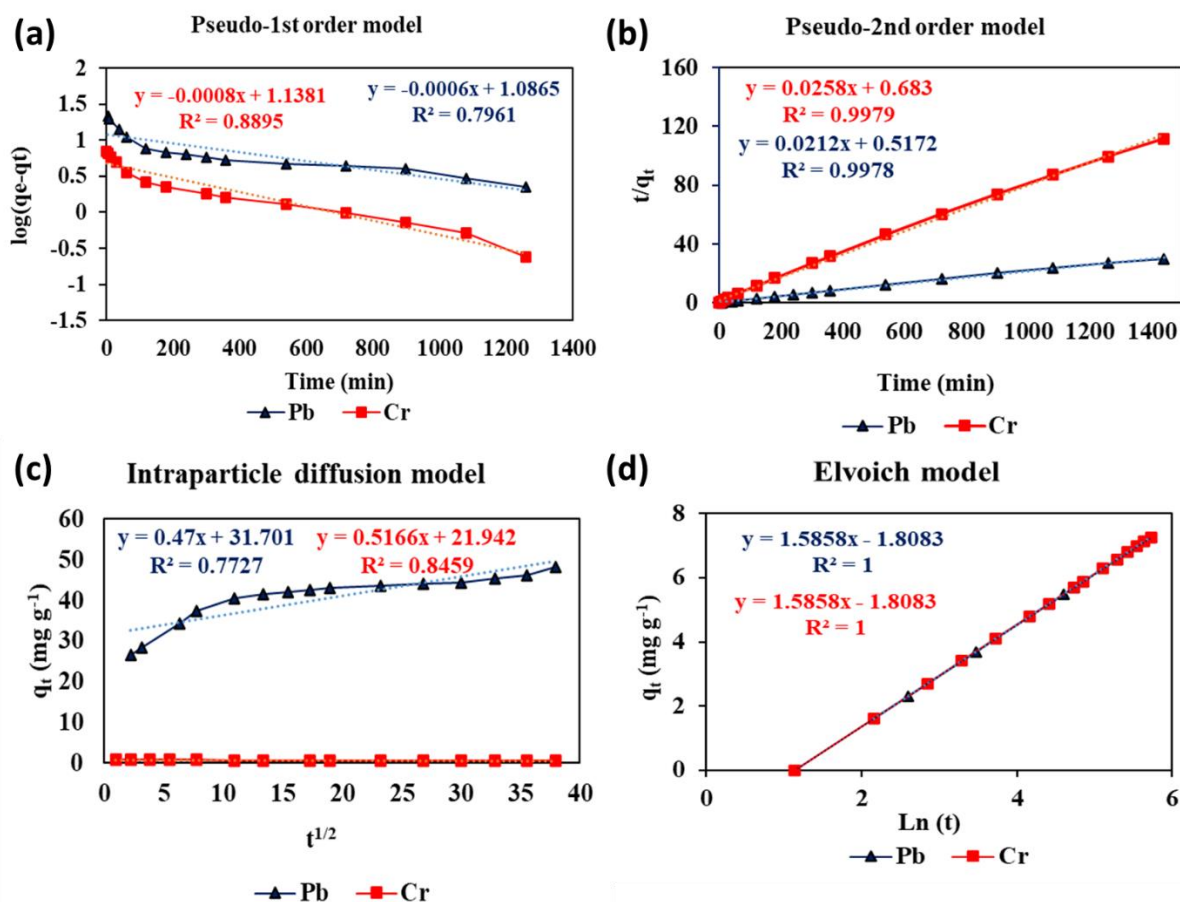

Figure S2. (a) Pseudo-first order, (b) Pseudo-second order, (c) Intra-particle diffusion and (d) Elvovich kinetic models for Pb(II) and Cr(T) adsorption onto Fe-GAC 5 adsorbent in an aqueous system.

## References

52. Langmuir, I. The Constitution and Fundamental Properties of Solids and Liquids. *J. Am. Chem. Soc.* **1916**, *38*, 2221–2295. <https://doi.org/10.1021/ja02268a002>.
53. Freundlich, H.M. Freundlich Over the Adsorption in Solution. *J. Phys. Chem.* **1906**, *57*, 385–471.
54. Sips, R. On the Structure of a Catalyst Surface. *J. Chem. Phys.* **1948**, *16*, 490–495. <https://doi.org/10.1063/1.1746922>.
55. Redlich, O.; Peterson, D.L. A Useful Adsorption Isotherm. *J. Phys. Chem.* **1959**, *63*, 1024.
56. Weber, W.J.; Morris, J.C. Kinetics of Adsorption on Carbon from Solution. *J. Sanit. Eng. Div.* **1963**, *89*, 31–60.
57. Ho, Y.S. Citation Review of Lagergren Kinetic Rate Equation on Adsorption Reactions. *Scientometrics* **2004**, *59*, 171–177.
58. Ho, Y.S.; McKay, G. Pseudo-Second Order Model for Sorption Processes. *Process Biochem.* **1999**, *34*, 451–465. [https://doi.org/10.1016/S0032-9592\(98\)00112-5](https://doi.org/10.1016/S0032-9592(98)00112-5).
59. Chien, S.H.; Clayton, W.R. Application of Elovich Equation to the Kinetics of Phosphate Release and Sorption in Soils. *Soil Sci. Soc. Am. J.* **1980**, *44*, 265–268. <https://doi.org/10.2136/sssaj1980.03615995004400020013x>.
